# Supplementary material for: A Functional Network Driven by MicroRNA-125a Regulates Monocyte Trafficking in Acute Inflammation
Source: MDPI journal article supplement (doi:10.3390/ijms231810684), 2022-09-14
Supplement: s1 [file s1]

## Supplementary Information

**Table S1.** The primer sequences.

| Method  | Name          | Sequence                      |
|---------|---------------|-------------------------------|
| Cloning | JAM-A forward | 5' GTGTGTTGGAGGGCTTCTTAG 3'   |
|         | JAM-A reverse | 5' ATGCAGACCACCCATGATCT 3'    |
| Cloning | JAM-L forward | 5' AGTCCCTTCATCTCAGCAGC 3'    |
|         | JAM-L reverse | 5' CAACCCATTACCCCAAACC 3'     |
| qRT-PCR | CCR2 forward  | 5'TGAGACAAGCCACAAGCTGA 3'     |
|         | CCR2 reverse  | 5' TTCTGATAAACCGAGAACGAGAT 3' |
| qRT-PCR | JAM-A forward | 5'AAGTTGTCCTGTGCCTACTCG 3'    |
|         | JAM-A reverse | 5' CGGTCCTCATAGGAAGCTGT 3'    |
| qRT-PCR | JAM-L forward | 5' CATGTTTTGCCCACTGAAAC 3'    |
|         | JAM-L reverse | 5' CATTGAGCCCAAGGAATAA 3'     |
| qRT-PCR | B2M forward   | 5'TTCTGGCCTGGAGGCTATC 3'      |
|         | B2M reverse   | 5' TCAGGAAATTTGACTTTCCATTC 3' |
| qRT-PCR | TBP forward   | 5' GAACATCATGGATCAGAAACA 3'   |
|         | TBP reverse   | 5' ATAGGGATTCCGGGAGTCAT 3'    |

## Supplementary Figure S1

**A**

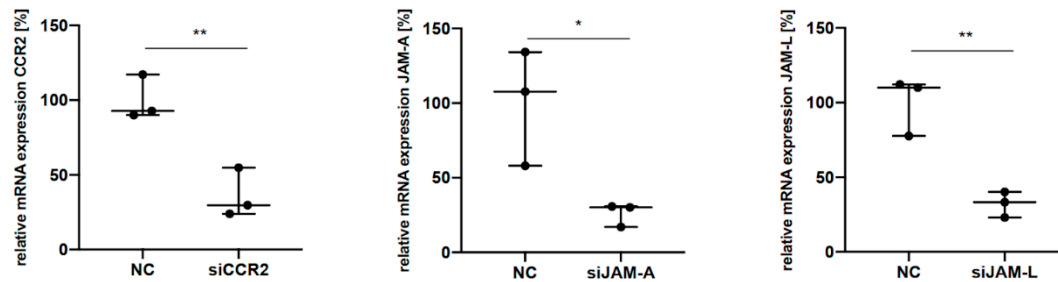

**Supplementary Figure S1 Knockdown efficiency of primary human monocytes transfected with siRNAs targeting CCR2, JAM-A and JAM-L.**

(A) Knockdown efficiency of siRNAs indicated as relative mRNA expression of respective target mRNA after transfection of individual siRNAs compared to negative control (n=3, \* $p < 0.05$ , \*\* $p < 0.01$ ).

Supplementary Figure S2. Gene names of regulated genes on the heatmap ordered by clusters.

## Cluster 1

|                          |                          |                         |
|--------------------------|--------------------------|-------------------------|
| 11726524 s at - ZFH3     | 11720057 a at - POLR1D   |                         |
| 11727707 a at - BBC3     | 11733389 a at - DEF6     |                         |
| 11742871 a at - PIK3IP1  | 11724081 a at - TOR2A    |                         |
| 11748806 a at - ARID3B   | 11724082 x at - TOR2A    |                         |
| 11720739 s at - ITPKB    | 11756694 a at - RNF44    |                         |
| 11751393 a at - PIK3IP1  | 11743343 at - RMND5A     |                         |
| 11741051 x at - IMPDH1   | 11724499 at - MFNG       |                         |
| 11729130 at - ANAPC16    | 11755502 x at - TECR     |                         |
| 11725297 a at - MAPRE2   | 11718676 x at - TMEM245  |                         |
| 11737440 a at - BMF      | 11763731 a at - VPS36    |                         |
| 11720768 at - METTL9     | 11722039 x at - FES      |                         |
| 11730935 a at - AKNA     | 11756983 a at - F11R     |                         |
| 11740932 a at - CSF3R    | 11758645 s at - EIF4EBP2 |                         |
| 11723521 x at - ZNF385A  | 11755355 s at - RCSD1    |                         |
| 11749329 a at - ARHGAP9  | 11730478 at - RNF125     |                         |
| 11721421 s at - RAP1GAP2 | 11753321 a at - NA       |                         |
| 11734778 a at - PCTP     | 11752590 s at - CCR2     |                         |
| 11750840 s at - TGFBR2   | 11723849 a at - MS4A6A   |                         |
| 11717720 a at - ST6GAL1  | 11718062 a at - NME3     |                         |
| 11735157 at - CYSLTR1    | 11718675 s at - TMEM245  |                         |
| 11737504 x at - SIRPB2   | 11744475 x at - TRABD    |                         |
| 11756441 x at - CSF3R    | 11729748 a at - IL10RA   |                         |
| 11727552 at - FZD2       | 11745326 x at - DUS1L    |                         |
| 11749377 a at - CECR1    | 11716402 at - EIF4EBP2   |                         |
| 11741447 s at - RNASE4   | 11738091 a at - ABTB1    |                         |
| 11755975 x at - PKIB     | 11722888 s at - NA       |                         |
| 11743171 a at - RCSD1    | 11756846 a at - PRAM1    |                         |
| 11763426 a at - TRAF3IP3 | 11722038 a at - FES      |                         |
| 11727643 s at - TRERF1   | 11740874 a at - FES      |                         |
| 11742816 a at - FAM13A   | 11755715 x at - CD46     |                         |
| 11738980 a at - CD4      | 11750001 x at - CLEC7A   |                         |
| 11743170 a at - RCSD1    | 11751549 a at - CD46     |                         |
| 11721583 x at - LRMP     | 11722952 a at - SLC27A1  |                         |
| 11760710 a at - MS4A6A   | 11720461 a at - F11R     |                         |
| 11731066 x at - GIMAP1   | 11720763 a at - SELPLG   |                         |
| 11737820 a at - MAP3K3   | 11729758 at - RGS18      |                         |
| 11724061 s at - OSBPL1A  | 11728559 a at - ASGR1    |                         |
| 11763695 a at - ABTB1    | 11717341 at - PTGFRN     |                         |
| 11725830 a at - PLCL2    | 11719667 s at - STMN1    |                         |
| 11739079 a at - ANP32A   | 11718988 s at - RNASE4   |                         |
| 11734777 a at - PCTP     | 11738982 at - CD4        |                         |
| 11729013 at - ACPP       | 11738981 x at - CD4      |                         |
| 11718818 s at - SLC26A6  | 11724979 a at - DPEP2    |                         |
| 11721107 a at - TRABD    | 11757026 x at - SERPINF1 |                         |
| 11734920 s at - PCYOX1L  | 11757025 s at - SERPINF1 |                         |
| 11758673 s at - SORD     | 11724008 a at - ENTPD1   |                         |
| 11726393 at - FGD4       | 11722970 a at - CREB5    |                         |
| 11750157 at - CD4        | 11722971 a at - CREB5    |                         |
| 11752633 a at - OLFM1    | 11733801 s at - CPPED1   |                         |
| 11723885 at - NATD1      | 11753705 x at - STMN1    |                         |
| 11754362 a at - TTC7A    | 11732351 at - HGF        |                         |
| 11727385 a at - PCCA     | 11722681 at - RBP7       |                         |
| 11730331 at - BRI3BP     | 11752825 a at - ARHGEF6  |                         |
| 11745554 a at - ASGR1    | 11735309 a at - MYCL     |                         |
| 11724292 s at - TRIT1    | 11728522 a at - MYCL     |                         |
| 11718283 a at - EIF4EBP1 | 11751425 x at - TRAF3IP3 |                         |
| 11732135 a at - ADCK3    | 11736681 at - SLC46A1    |                         |
| 11756746 s at - NA       | 11755091 a at - ABCA7    |                         |
| 11739744 x at - MX11     | 11724291 a at - TRIT1    |                         |
| 11757868 a at - PIK3IP1  | 11721582 a at - LRMP     |                         |
| 11757767 s at - NAV1     | 11721569 a at - ANG      |                         |
| 11754492 x at - PLCB2    | 11746729 a at - LRMP     |                         |
| 11720595 a at - CD46     | 11745165 a at - TRAF3IP3 |                         |
| 11725092 s at - RFX5     | 11759029 at - BRI3BP     |                         |
| 11742219 a at - CD46     | 11751424 a at - TRAF3IP3 |                         |
| 11751532 x at - CD46     | 11749685 a at - FAM13A   |                         |
| 11731200 a at - TLR5     | 11750052 a at - ASGR2    |                         |
| 11758893 at - MLXIP      | 11722448 at - KCNM84     |                         |
| 11727007 at - SORT1      | 11759152 at - CYSLTR1    |                         |
| 11753491 s at - ERP29    | 11749188 a at - ENTPD1   |                         |
| 11718284 x at - EIF4EBP1 | 11724992 x at - GTPBP3   |                         |
|                          |                          | 11743378 a at - NIN     |
|                          |                          | 11723433 at - TBC1D22A  |
|                          |                          | 11751525 a at - CCDC69  |
|                          |                          | 11730323 at - RPS29     |
|                          |                          | 11740088 s at - PIK3IP1 |
|                          |                          | 11717339 s at - SORD    |
|                          |                          | 11752942 s at - DBP     |
|                          |                          | 11716232 at - CTNNB1P1  |
|                          |                          | 11736962 a at - MBNL2   |
|                          |                          | 11758238 s at - ABCC4   |
|                          |                          | 11749411 a at - SPIDR   |
|                          |                          | 11720856 a at - INSR    |
|                          |                          | 11746542 x at - SPIDR   |
|                          |                          | 11747171 a at - MXD4    |
|                          |                          | 11718304 s at - NA      |
|                          |                          | 11748699 a at - RGS14   |
|                          |                          | 11735728 x at - ZNF385A |
|                          |                          | 11725091 at - RFX5      |
|                          |                          | 11720464 x at - F11R    |
|                          |                          | 11751394 s at - PIK3IP1 |
|                          |                          | 11742872 s at - PIK3IP1 |
|                          |                          | 11759028 at - BRI3BP    |
|                          |                          | 11744281 a at - FAM53B  |
|                          |                          | 11749056 a at - RCSD1   |
|                          |                          | 11730477 at - RNF125    |
|                          |                          | 11718081 a at - ATP2B4  |
|                          |                          | 11743879 at - MAML3     |
|                          |                          | 11719332 at - ARHGAP15  |
|                          |                          | 11750682 a at - TPCN1   |
|                          |                          | 11725093 a at - RFX5    |
|                          |                          | 11741179 a at - ABTB1   |
|                          |                          | 11749057 x at - RCSD1   |
|                          |                          | 11749214 a at - SELPLG  |
|                          |                          | 11741250 a at - SH2D3C  |
|                          |                          | 11747498 s at - SORD    |
|                          |                          | 11729268 a at - STAC3   |
|                          |                          | 11740018 a at - INSR    |
|                          |                          | 11754685 a at - RGS14   |
|                          |                          | 11754990 a at - EPB41   |
|                          |                          | 11755873 a at - ACS1    |
|                          |                          | 11727553 a at - PKIB    |
|                          |                          | 11737038 at - C19orf38  |
|                          |                          | 11743677 at - P2RY8     |
|                          |                          | 11717508 at - IRF4      |
|                          |                          | 11731147 at - TLR7      |
|                          |                          | 11756371 a at - VSI64   |
|                          |                          | 11731148 at - TLR7      |
|                          |                          | 11762274 x at - HLA-DMB |
|                          |                          | 11725827 s at - CD1D    |
|                          |                          | 11729871 a at - ASGR2   |
|                          |                          | 11760018 at - CLEC10A   |
|                          |                          | 11727554 s at - PKIB    |
|                          |                          | 11726485 at - CPED1     |
|                          |                          | 11741874 x at - SEPP1   |

## Cluster 2

11753719 a at - GMFB  
11753358 a at - ACVR1  
11758185 s at - TWF1  
11746929 a at - MOB3C  
11735676 a at - OSGIN1  
11717524 s at - RDX  
11748968 x at - RDX  
11724523 a at - CDK5RAP2  
11728498 a at - SVIL  
11745431 a at - SVIL  
11728499 x at - SVIL  
11722593 s at - BCAP29  
11757628 s at - TSPYL2  
11717843 at - ETNK1  
11752386 a at - NAB1  
11730052 a at - SNX16  
11716945 s at - TWF1  
11746201 a at - NAB1  
11743972 a at - DDIT4  
11734657 s at - NA  
11745021 a at - MYC  
11721308 at - PHLDA1  
11758781 at - EMP1  
11744648 s at - AIFM2  
11733240 at - IRAK2  
11757558 s at - LONRF1  
11729751 a at - LPAR1  
11724524 x at - CDK5RAP2  
11716654 a at - EML4  
11716653 x at - EML4  
11716500 a at - PIR  
11763806 x at - KCNN4  
11721307 at - PHLDA1  
11729750 a at - LPAR1  
11715711 a at - AKR1C3  
11721775 s at - ASPH  
11745104 a at - PJA1  
11724715 a at - PJA1  
11748596 a at - KLHL2  
11757836 s at - SEC24A  
11763581 a at - SLC30A6  
11724676 a at - KLHL2  
11731452 s at - SEC62  
11720444 s at - ERLIN1  
11748951 a at - CTNNB1  
11748952 x at - CTNNB1  
11747388 x at - CTNNB1  
11747361 x at - HMGA1  
11750680 x at - CTNNB1  
11723135 s at - SRC  
11720755 at - STAT3  
11746889 a at - CKAP4  
11733110 s at - TLK1  
11736217 at - MAP3K8  
11747602 a at - MAP3K8  
11749022 x at - CTNNB1  
11720769 a at - PPIF  
11717716 at - FNDC3B  
11724424 at - GPR68  
11717567 a at - NQO1  
11718875 a at - PNMA1  
11733109 a at - TLK1  
11737748 a at - GMFB  
11718218 at - RAB22A  
11736513 s at - NMT2  
11736006 at - MAPK11P1L  
11732718 at - EREG  
11717715 at - FNDC3B  
11722796 a at - MAPK6  
11763785 x at - KCNN4  
11719227 x at - KCNN4  
11729847 a at - CCL7

## Cluster 3

11744921 a at - SLC43A1  
11756191 a at - MAN1C1  
11750879 a at - CREB5  
11738889 at - IQCD  
11720857 a at - INSR  
11728286 at - RBMS2  
11746198 a at - METTL9  
11751817 x at - MBNL2  
11725410 at - NAV1  
11737027 a at - FLT3  
11748399 s at - VCL  
11721626 a at - SEPT6  
11746773 a at - SLC27A1  
11719036 at - UVRAG  
11725053 x at - TOP1MT  
11755265 s at - NT5DC1  
11741251 a at - SIRPB2  
11731879 a at - NLRP1  
11747618 a at - ADCK3  
11748695 a at - SYNGR1  
11735306 at - C9orf139  
11733650 s at - FAM228B  
11755804 a at - SEMA4D  
11730068 a at - HGF  
11740366 a at - SHMT1  
11753045 a at - MBNL2  
11732417 at - FAM105A  
11720204 at - NT5DC1  
11728285 at - RBMS2  
11732699 a at - PKIB  
11732700 x at - PKIB  
11758583 s at - TMEM154  
11724763 s at - DEPTOR  
11737134 x at - ZNF385A  
11731602 at - TMEM154  
11752189 a at - ARHGEF6  
11728961 a at - NA  
11754521 a at - MBNL2  
11734791 x at - SEPT6  
11742063 a at - BTN3A1  
11753046 x at - MBNL2  
11724293 a at - TRIT1  
11739770 s at - TMOD2  
11759015 at - SPECC1  
11747732 a at - ADCK3  
11753704 a at - STMN1  
11751748 a at - CHN2  
11727642 a at - TRERF1  
11719666 a at - STMN1  
11729227 a at - GRK5  
11716403 at - EIF4EBP2  
11730843 a at - MX1  
11731578 s at - ACSS1  
11749445 a at - ARHGAP15  
11726459 at - FAM117B  
11762132 a at - ΔMICΔ1

## Cluster 4

11722391 at - MTF1  
11725045 a at - UAP1  
11749608 a at - RNF11  
11753001 a at - PPARG  
11758864 at - SRP19  
11736274 at - TLR2  
11718139 at - PDXK  
11759869 x at - PJA1  
11746814 x at - NAB1  
11739508 a at - NAA30  
11721330 s at - RNGTT  
11739746 s at - SVIL  
11717383 at - FOPNL  
11761935 at - HNRNPPL  
11730914 a at - ERLIN1  
11763822 at - EREG  
11747839 a at - LPAR1  
11717527 a at - RDX  
11729235 s at - E2F6  
11725276 a at - CDK5RAP2  
11731077 a at - LONRF1  
11731076 a at - LONRF1  
11763594 a at - HS3ST3B1  
11739367 at - ASPH  
11757312 x at - SERPINE1  
11726809 x at - SLC12A8  
11724275 s at - TMEM158  
11735268 s at - SLC41A2  
11727186 a at - WNT5A  
11734811 a at - EGR2  
11735116 a at - MET  
11721774 a at - ASPH  
11731577 a at - SLC22A1  
11715751 a at - DPYSL3  
11737251 at - CD226  
11745300 a at - DNAJC6  
11758577 s at - ELOVL7  
11727189 x at - WNT5A  
11751610 a at - DPYSL3  
11717376 a at - SLC25A25  
11724915 at - TMTC3  
11746856 a at - SERPINE1  
11735724 a at - TP53BP1  
11718808 a at - TP53BP1  
11752291 x at - SLC30A6

## Cluster 5

11759611 at - SMIM11A  
11724007 s at - ENTPD1  
11725568 a at - ATP8A1  
11751656 a at - TMEM154  
11721955 at - RFX7  
11756758 x at - SPECC1  
11758230 s at - NFIA  
11749401 a at - TRIT1  
11732747 at - HGF  
11716390 a at - BACE1  
11724625 a at - SPATA7  
11756155 a at - NHS  
11724762 a at - DEPTOR

## Cluster 6

11728984 a at - MTHFD1L  
11756610 a at - CD226  
11727188 at - WNT5A  
11719215 a at - NA  
11727840 at - HPD  
11752813 a at - MSC-AS1  
11745301 a at - DNAJC6

## Cluster 7

11715635 x at - TMEM14C  
11744429 a at - STX10  
11719780 at - TNFAIP8L2  
11739119 s at - CNPY3  
11739146 a at - MKNK2  
11739720 a at - GIMAP8  
11757612 a at - ASRGL1  
11732589 a at - ZNF467  
11742220 x at - CD46  
11716633 a at - TMEM50A  
11719025 a at - ZNF652  
11716404 s at - EIF4EBP2  
11751550 x at - CD46  
11718610 at - TP53INP1  
11722767 s at - MBNL2  
11723692 a at - CD302  
11718090 a at - TPCN1  
11732418 at - FAM105A  
11729759 at - RGS18  
11719845 a at - SMAP2  
11747948 a at - SMAP2  
11720219 a at - MAP3K3  
11739118 a at - CNPY3  
11719157 x at - ASRGL1  
11717903 s at - IER3IP1  
11723712 x at - MLXIP  
11742744 a at - STX10  
11733402 a at - CLEC7A  
11754976 x at - CNPY3  
11732415 s at - TIAM1  
11745553 s at - SMAP2  
11720218 a at - MAP3K3  
11730936 s at - AKNA  
11730498 s at - MXI1  
11737870 s at - FAM78A  
11743771 at - GIMAP7  
11757602 x at - ERP29  
11759405 x at - STX10  
11743903 a at - CD46  
11735060 a at - CD46  
11744364 s at - INPP5D  
11717618 s at - PXN  
11723368 a at - ARHGEF6  
11726947 a at - TLR8  
11717340 at - PTGFRN  
11718002 at - C10orf54  
11715816 at - ZFP36L2  
11740238 a at - SULF2  
11720460 x at - F11R  
11716527 a at - GSTK1  
11721159 x at - DRAM2  
11715627 x at - ALDH2  
11717762 a at - CPVL  
11749293 x at - MS4A6A  
11730996 a at - AMICA1  
11728523 a at - MYCL  
11752737 a at - CLEC7A  
11733403 x at - CLEC7A  
11727788 a at - PIGS  
11741510 a at - HERPUD1  
11730383 a at - SNX18  
11716359 a at - FAM96A  
11735681 x at - CD46  
11726820 a at - ARHGAP9  
11718971 x at - CD46  
11720380 a at - IMPDH1  
11742681 s at - ERP29  
11743931 x at - ERP29  
11752331 s at - NA  
11736017 s at - PXN  
11721702 a at - CMTM7  
11719844 at - SMAP2

11750531 a at - PYCARD  
11721169 a at - PYCARD  
11730090 a at - NA  
11716554 a at - HLA-DMA  
11745989 a at - HLA-DMA  
11757815 s at - METTL7A  
11723691 at - CD302  
11752948 a at - PRCP  
11721158 a at - DRAM2  
11729747 a at - IL10RA  
11726948 at - TLR8  
11715848 a at - ATP5G2  
11718160 at - KLF13  
11754471 a at - HLA-DMB  
11750769 s at - CCR2  
11716846 a at - MS4A6A  
11746962 x at - HLA-DMB  
11735352 x at - SLC37A2  
11731676 s at - CCR2  
11740531 a at - CLEC10A  
11745500 a at - CLEC10A  
11746961 a at - HLA-DMB  
11750856 s at - CCR2  
11749803 s at - ARL8B  
11754863 s at - VPS37C

## Cluster 8

11749803 s at - ARL8B  
11754863 s at - VPS37C  
11745421 a at - BID  
11755603 a at - ARL8B  
11749021 s at - CTNNB1  
11731110 at - ADAM17  
11716718 at - GLA  
11720458 at - CAPRIN1  
11756634 a at - GSR  
11721502 at - SWAP70  
11719354 s at - SH3BP5  
11736273 a at - TLR2  
11747640 a at - TDP2  
11743066 s at - PTDSS1  
11722031 s at - RNF11  
11747482 a at - HNRNPR  
11726583 s at - CKAP4  
11721801 at - ARL8B  
11742819 at - PLAUR  
11718648 s at - ACVR1  
11722705 at - B3GN15  
11720771 x at - PPIF  
11722728 a at - EGR2  
11744680 a at - SLC7A11  
11739475 s at - NAB1  
11752899 s at - SEC62  
11764019 s at - NAB1  
11753204 a at - PTDSS1  
11719368 s at - MAPKAPK2  
11717326 at - KLF9  
11721448 a at - ETF1  
11747387 a at - CTNNB1  
11717526 a at - RDX  
11720370 x at - RTCA  
11729163 a at - BTG3  
11717525 s at - RDX  
11721306 at - PHLDA1  
11739366 at - ASPH  
11717582 a at - RGCC  
11717566 at - EMP1  
11719355 s at - SH3BP5  
11721305 a at - PHLDA1  
11720770 a at - PPIF

## Cluster 9

11741350 a at - ANXA11  
11757303 s at - BNIP3L  
11741103 a at - ANXA11  
11754666 a at - CORO1A  
11742944 a at - CORO1A  
11718001 a at - C10orf54  
11715817 at - ZFP36L2  
11715818 at - ZFP36L2  
11754681 s at - HLA-DMB  
11717012 s at - VAMP8  
11716377 s at - GRN  
11757420 s at - ZFP36L2  
11748543 a at - TXNIP  
11759666 x at - HLA-DPB1  
11724682 s at - TGFBR2  
11756073 x at - HLA-DPB1  
11756393 x at - CORO1A

## Cluster 10

11750538 x at - TXN  
11753775 x at - TXN  
11731454 a at - SEC62  
11721876 s at - SLC7A11  
11720772 s at - PPIF  
11753804 x at - TXN  
11715470 x at - TXN

## Cluster 11

11756431 s at - TXNIP  
11759642 x at - HLA-DRB1

## Cluster 12

11731450 s at - SEC62  
11719819 s at - EMC10  
11759080 at - GSR  
11755523 a at - RBM47  
11722167 s at - CTNNB1  
11754833 a at - TLR2  
11740390 a at - RBM47  
11721802 s at - ARL8B  
11715649 s at - TXNRD1  
11721875 at - SLC7A11  
11717565 s at - EMP1  
11754026 a at - CXCL8  
11763226 x at - CXCL8
